# Supplementary material for: Biosafe, self-adhesive, recyclable, tough, and conductive hydrogels for multifunctional sensors
Source: Royal Society of Chemistry journal article supplement (doi:10.1039/d1bm00665g), 2021-01-01
Supplement: d1bm00665g1.pdf [file d1bm00665g1.pdf]

---

**Supporting information**

**Biosafety, Self-Adhesive, Recyclable, Tough, and Conductive Hydrogels for  
Multifunctional Sensor**

Ling Fan<sup>1</sup>, Lizhen Hu<sup>2</sup>, Jinliang Xie<sup>1</sup>, Zhongjie He<sup>1</sup>, Yaping Zheng\*<sup>1</sup>, DaiXu Wei\*<sup>3</sup>,  
Dongdong Yao<sup>1</sup>, Sufangfang<sup>1</sup>

<sup>1</sup> School of Chemistry and Chemical Engineering, Northwestern Polytechnical University Xi'an, Shaanxi 710072, P. R. China, Telephone and fax numbers: +86-029-88431688

<sup>2</sup> School of Chemical Engineering and Technology, Xi'an Jiaotong University, Xi'an, Shaanxi, 710049, P.R. China.

<sup>3</sup> Key Laboratory of Resource Biology and Biotechnology in Western China, Ministry of Education. School of Medicine, Northwest University, 229 Taibai North Road, Xi'an 710069, China.

\* Corresponding authors. E-mail: [zhengyp@nwpu.edu.cn](mailto:zhengyp@nwpu.edu.cn) (Y.P. Zheng), [weidaixu@nwu.edu.cn](mailto:weidaixu@nwu.edu.cn) (D.X. Wei)

**Table S1** Hydrogel samples of different components and concentrations.

---

| Samples | Concentration<br>of SA-<br>DOPA<br>(wt.%) | Concentration<br>of Borax<br>(wt.%) | Concentration<br>of PVA<br>(wt.%) | Concentration<br>of AgNW<br>(wt.%) | Concentration of<br>SA (wt.%) |
|---------|-------------------------------------------|-------------------------------------|-----------------------------------|------------------------------------|-------------------------------|
| 1       | 0                                         | 0.22                                | 11                                | 0.11                               | 0                             |
| 2       | 0.22                                      | 0.22                                | 11                                | 0.11                               | 0                             |
| 3       | 0.33                                      | 0.22                                | 11                                | 0.11                               | 0                             |
| 4       | 0.33                                      | 0.33                                | 11                                | 0.11                               | 0                             |
| 5       | 0.33                                      | 0.44                                | 11                                | 0.11                               | 0                             |
| 6       | 0.22                                      | 0.33                                | 11                                | 0.11                               | 0                             |
| 7       | 0.22                                      | 0.44                                | 11                                | 0.11                               | 0                             |

---

|   |   |      |    |      |      |
|---|---|------|----|------|------|
| 8 | 0 | 0.44 | 11 | 0.11 | 0.33 |
|---|---|------|----|------|------|

**Table S2** Estimated toughness, adhesion, elongation at break, and tensile stress strength of various conductive hydrogel-based or PDA-based strain sensors at room temperature.

|                    | Toughness<br>(MJ/m <sup>3</sup> ) | Adhesion | Elongation<br>at break (%) | Tensile<br>stress<br>(MPa) | Ref.               |
|--------------------|-----------------------------------|----------|----------------------------|----------------------------|--------------------|
| This work          | 55.3                              | YES      | 500                        | 0.289                      | --                 |
| PVA-CNF            | 5.25                              | NO       | 660                        | 2.1                        | Ref. <sup>1</sup>  |
| TA-PVA             | 395.2                             | NO       | 404                        | 104.2                      | Ref. <sup>2</sup>  |
| Cellulose/PVA      | --                                | NO       | 737                        | 0.0374                     | Ref. <sup>3</sup>  |
| PVA/PEI            | --                                | NO       | 500                        | 0.6                        | Ref. <sup>4</sup>  |
| PDA-clay-PSBMA     | --                                | YES      | 900                        | 0.09                       | Ref. <sup>5</sup>  |
| DNA/DEX-g-DOPA     | Very weak                         | YES      | Too soft                   | Too soft                   | Ref. <sup>6</sup>  |
| PVA-PDA            | Very weak                         | YES      | 400                        | <0.6×10 <sup>-3</sup>      | Ref. <sup>7</sup>  |
| PVA-FSWCNT-<br>PDA | Too soft                          | YES      | Too soft                   | Too soft                   | Ref. <sup>8</sup>  |
| PDA-talc-PAM       | Very weak                         | YES      | 1500                       | 25×10 <sup>-3</sup>        | Ref. <sup>9</sup>  |
| OHGel              | ---                               | NO       | 1700                       | 0.197                      | Ref. <sup>10</sup> |
| Hydrogel diodes    | weak                              | YES      | 130                        | 0.05                       | Ref. <sup>11</sup> |

**Table S3** The conductivity of the different hydrogels

| Samples                | Conductivity/S.m <sup>-1</sup> |
|------------------------|--------------------------------|
| PB                     | 0.039                          |
| PS <sub>0.22%</sub> B  | 0.073                          |
| PS <sub>0.22%</sub> AB | 0.094                          |
| PS <sub>0.33%</sub> AB | 0.238                          |
| Recycled-1             | 0.245                          |

|            |       |
|------------|-------|
| Recycled-2 | 0.242 |
| Recycled-3 | 0.237 |
| Recycled-4 | 0.235 |

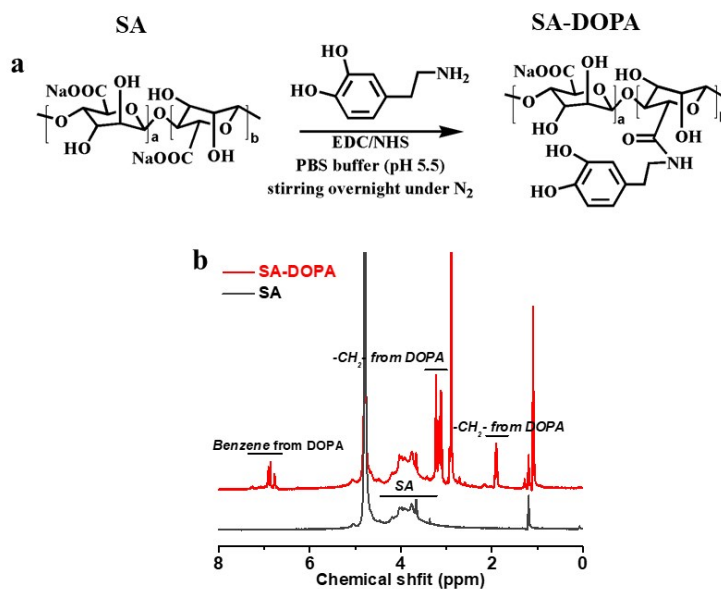

**Figure S1** (a) General synthesis of SA–DOPA conjugates via EDC/NHS coupling; (b)  $^1\text{H}$ NMR spectrum of SA-DOPA and SA.

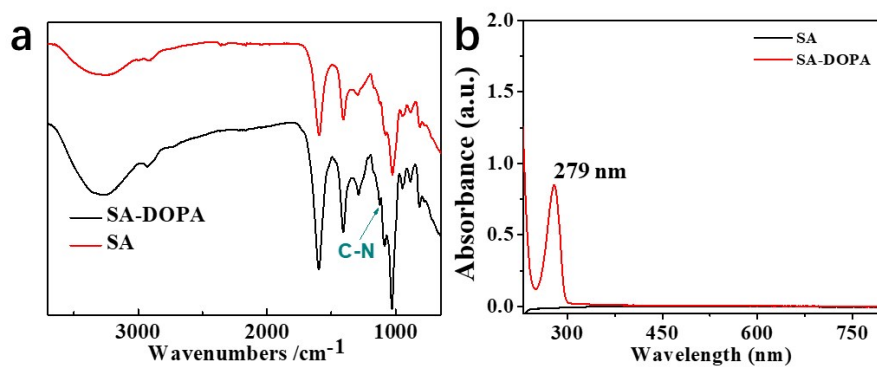

**Figure S2** (a) FT-IR spectra of SA-DOPA and SA. The presence of C–N bond at  $1120\text{ cm}^{-1}$  indicated that SA-DOPA was successfully synthesized. (b) UV-Vis spectra of SA-DOPA and SA. The strong absorption peak at  $279\text{ nm}$  indicated the presence of catechol group, while the normal SA had no significant absorption at  $279\text{ nm}$ .

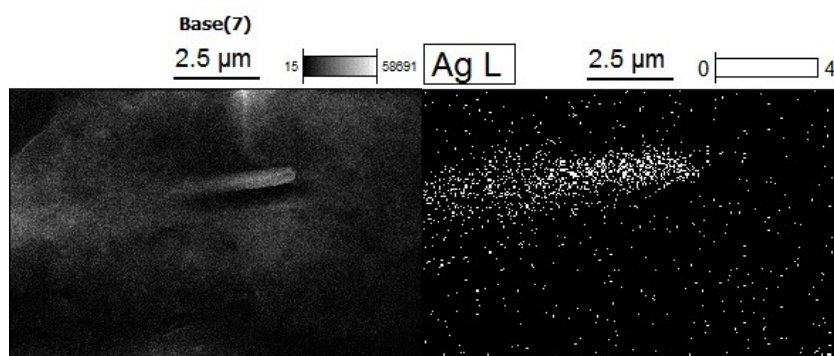

**Figure S3** EDS-mapping of Ag in PS<sub>0.33%</sub>AB<sub>0.44%</sub> hydrogel

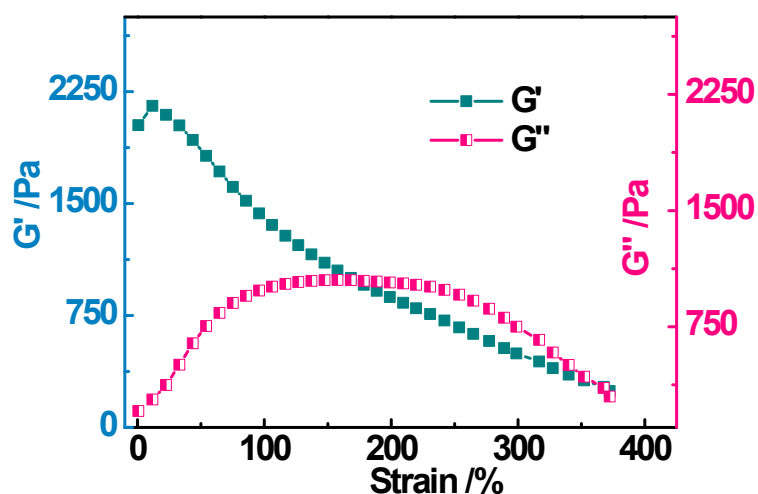

**Figure S4** Strain sweep measurement of the PSAB hydrogel at 25 °C (storage modulus  $G'$  and loss modulus  $G''$  as a function of strain  $\gamma$ ).

#### References

1. Ye, Y.; Zhang, Y.; Chen, Y.; Han, X.; Jiang, F., Cellulose Nanofibrils Enhanced, Strong, Stretchable, Freezing-Tolerant Ionic Conductive Organohydrogel for Multi-Functional Sensors. *Advanced Functional Materials* **2020**, *30* (15), 2003430.
2. Wenwen, N.; Youliang, Z.; Rui, W.; Zhongyuan, L.; Xiaokong, L.; Junqi, S., Remalleable, Healable, and Highly Sustainable Supramolecular Polymeric Materials Combining Superhigh Strength and Ultrahigh Toughness. *Acs Applied Materials & Interfaces* **2020**, *12*(27), 30805.
3. Wang, Y.; Zhang, L.; Lu, A., Highly stretchable, transparent cellulose/PVA composite hydrogel for multiple sensing and triboelectric nanogenerators. *Journal of Materials Chemistry A* **2020**, *8*(28), 13935

- 
4. Wang, C.; Hu, K.; Zhao, C.; Zou, Y.; Liu, Y.; Qu, X.; Jiang, D.; Li, Z.; Zhang, M.-R.; Li, Z., Customization of Conductive Elastomer Based on PVA/PEI for Stretchable Sensors. *Small* **2020**, *16* (7), 1904758.
  5. Pei, X.; Zhang, H.; Zhou, Y.; Zhou, L.; Fu, J., Stretchable, self-healing and tissue-adhesive zwitterionic hydrogels as strain sensors for wireless monitoring of organ motions. *Materials Horizons* **2020**, *7*(7),1872.
  6. Han, J.; Cui, Y.; Han, X.; Liang, C.; Liu, W.; Luo, D.; Yang, D., Super-Soft DNA/Dopamine-Grafted-Dextran Hydrogel as Dynamic Wire for Electric Circuits Switched by a Microbial Metabolism Process. *Advanced Science* **2020**, *7*(13), 2000684.
  7. Liu, S.; Zheng, R.; Chen, S.; Wu, Y.; Liu, H.; Wang, P.; Deng, Z.; Liu, L., A compliant, self-adhesive and self-healing wearable hydrogel as epidermal strain sensor. *Journal of Materials Chemistry C* **2018**, *6* (15), 4183.
  8. Liao, M. H.; Wan, P. B.; Wen, J. R.; Gong, M.; Wu, X. X.; Wang, Y. G.; Shi, R.; Zhang, L. Q., Wearable, Healable, and Adhesive Epidermal Sensors Assembled from Mussel-Inspired Conductive Hybrid Hydrogel Framework. *Advanced Functional Materials* **2017**, *27* (48), 1703852.
  9. Chen, T.; Chen, Y. J.; Rehman, H. U.; Chen, Z.; Yang, Z.; Wang, M.; Li, H.; Liu, H. Z., Ultratough, Self-Healing, and Tissue-Adhesive Hydrogel for Wound Dressing. *Acs Applied Materials & Interfaces* **2018**, *10* (39), 33523.
  10. Xie, W. K.; Duan, J. J.; Wang, H.; Li, J.; Liu, R.; Yu, B. Y.; Liu, S. Y.; Zhou, J., Ultra- stretchable, bio- inspired ionic skins that work stably in various harsh environments. *Journal of Materials Chemistry A* **2018**, *6* (47), 24114.
  11. Duan, J.; Xie, W.; Yang, P.; Li, J.; Xue, G.; Chen, Q.; Yu, B.; Liu, R.; Zhou, J., Tough hydrogel diodes with tunable interfacial adhesion for safe and durable wearable batteries. *Nano Energy* **2018**, *48*, 569.
